TERRA DNA pol  
 98°C 2min  
 35 cycles 98°C 10 sec  
 60°C 15 sec  
 68°C 30 sec  
 68°C 10 min

1. Os IR64
2. Os Gigante
3. Og CG14
4. Og Tog581
5. Kabre KT2#1
6. Kabre KT1#1

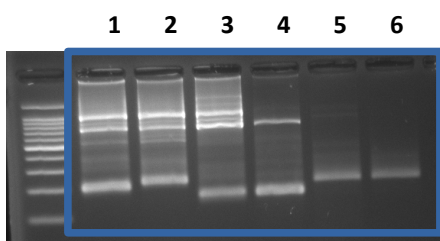

RM197

3% agarose gel

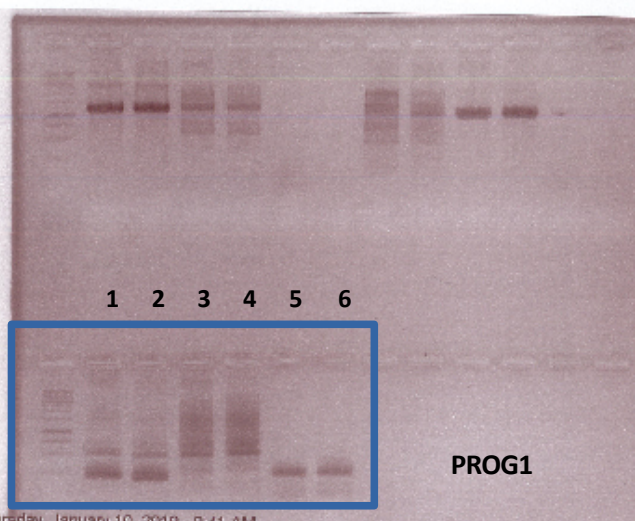

PROG1

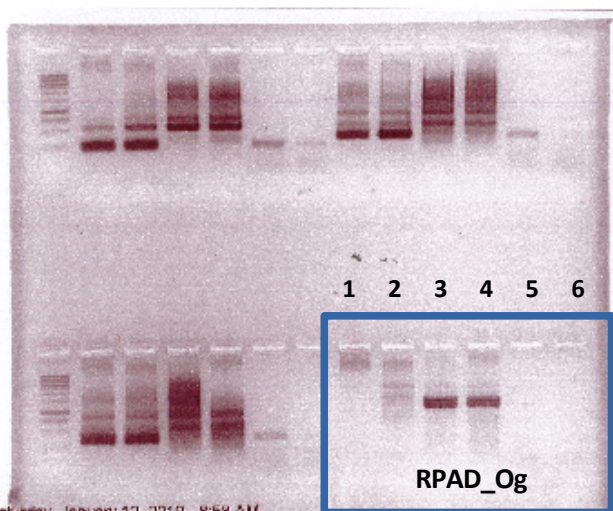

RPAD\_Og

1,5% agarose gel

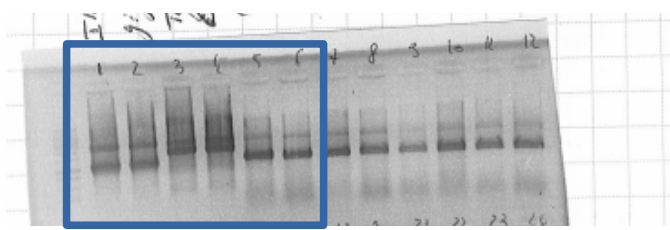

S1 locus

2% agarose gel

1. 1. *O sativa* IR64
2. 2. *O sativa* Gigante
3. 3. *O glaberrima* CG14
4. 4. *O glaberrima* Tog581
5. 5-12. Kabre

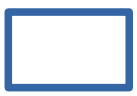

Part of the raw images used for the Figure 3
