## Supplemental Figure S1

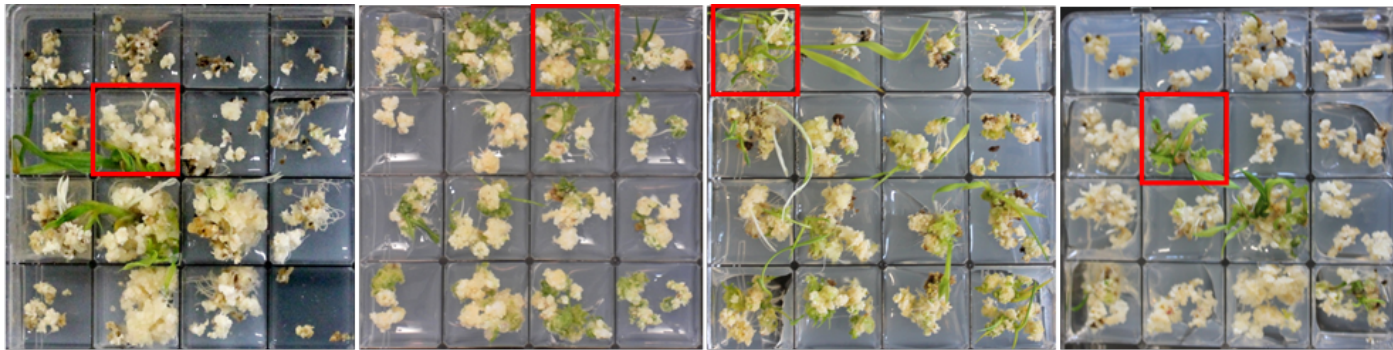

Examples of gradient plates for (left to right) TOG7275, TOG7261, TOG5548, CG14 optimal hormonal concentration ideal for root/shoot development are reported in the table below. Hormonal concentrations in each well are reported in Supplemental Table S1. Red Boxes highlight hormonal concentrations ideal for shoot/root regeneration of selected accession. Below are reported ideal hormonal concentration for plant regeneration of 8 selected accessions.
