# Supplementary material for: CRISPR-mediated accelerated domestication of African rice landraces
Source: PLOS journal article supplement (doi:10.1371/journal.pone.0229782), 2020-03-03

**Supplemental Figure S2: A)** exon – intron structure of target loci, gRNA sequences are reported for each locus, **B)** mutant genotypes considered in this study, gRNAs are highlighted in yellow, PAM sequence in bold

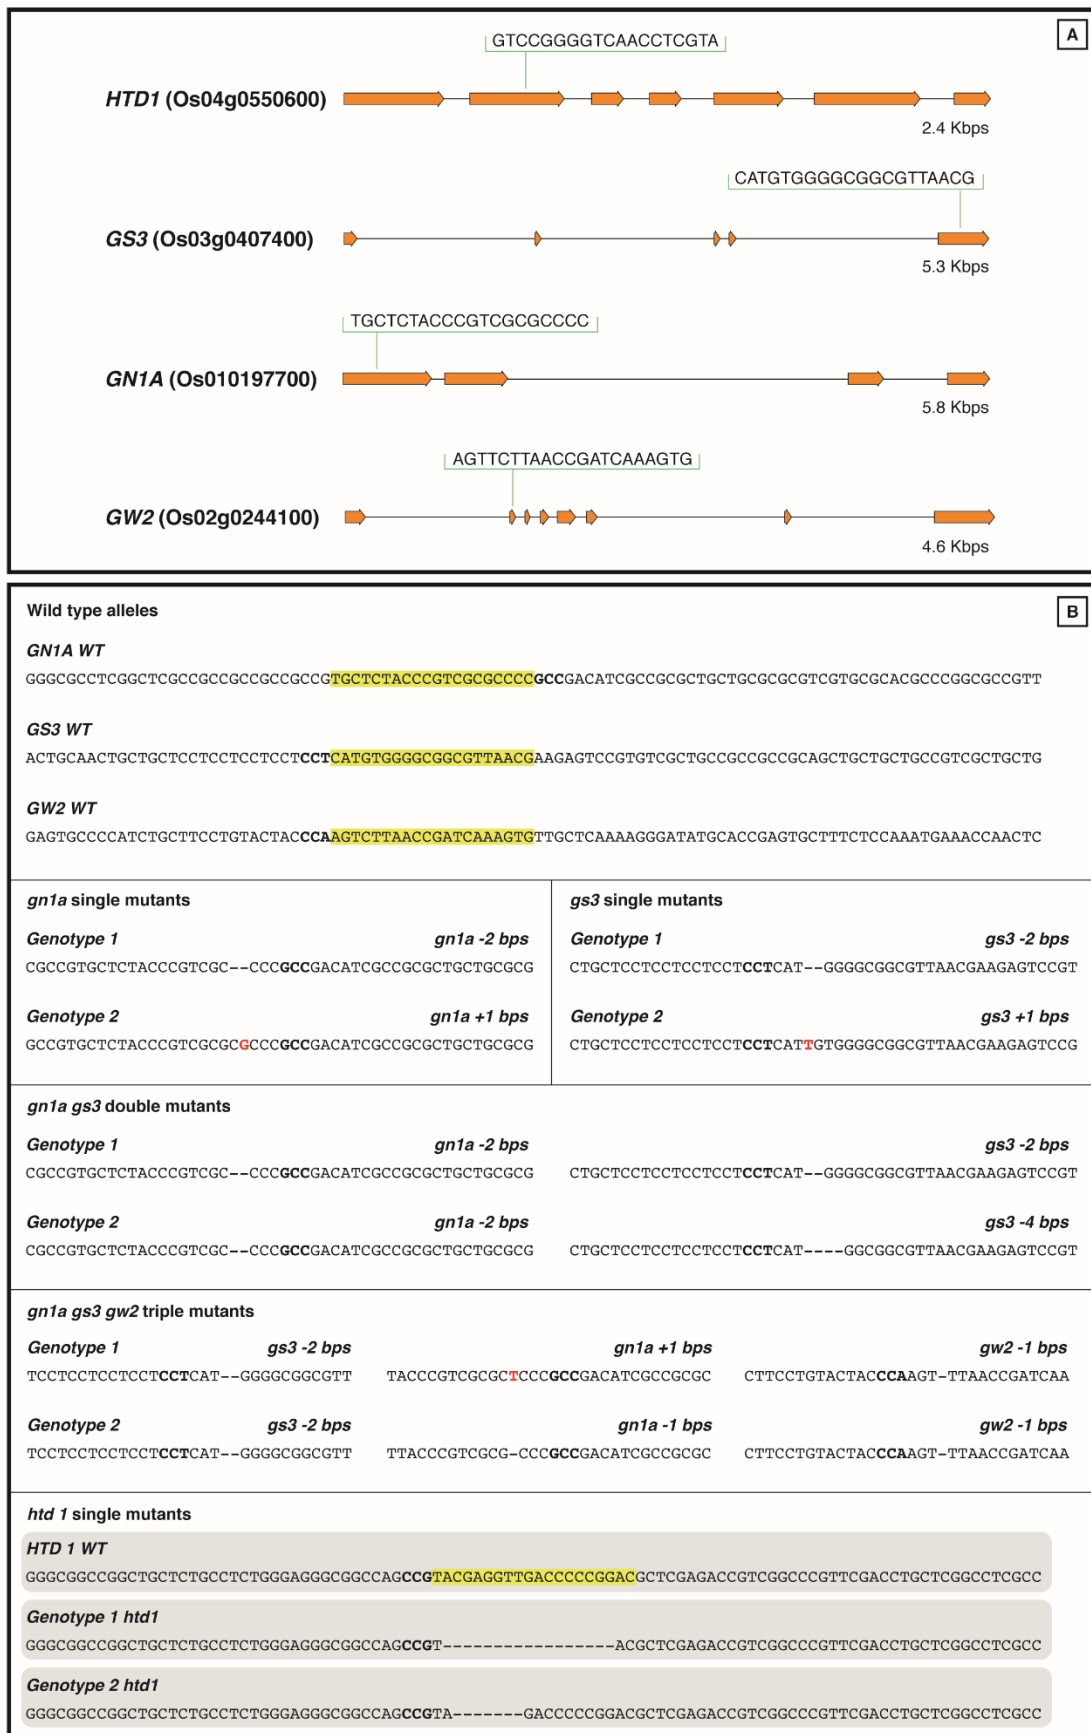

Supplement: S4 (10.1371/journal.pone.0229782.s004) [file journal.pone.0229782.s004]
